# Supplementary material for: Circulating Cell-Free DNA Reflects the Clonal Evolution of Breast Cancer Tumors
Source: Cancers (Basel). 2022 Mar 4;14(5):1332. doi: 10.3390/cancers14051332 (PMC8909912; doi:10.3390/cancers14051332)
Supplement: Supplementary file 1 [file cancers-14-01332-s001.zip]

Archive with 4 entries (4 files):
- FigureS1.pdf
- FigureS2.pdf
- TableS1.csv
- TableS2.csv
