# Supplementary material for: Circulating Cell-Free DNA Reflects the Clonal Evolution of Breast Cancer Tumors
Source: Cancers (Basel). 2022 Mar 4;14(5):1332. doi: 10.3390/cancers14051332 (PMC8909912; doi:10.3390/cancers14051332)
Supplement: Supplementary file 1 [file cancers-14-01332-s001.zip › TableS1.csv]

AGR2
AKT1
AKT2
ALK
ANP32E
APC
ARID1A
ARID1B
ARID2
ASXL1
ATM
ATR
BAP1
BARD1
BLM
BRAF
BRCA1
BRCA2
BRIP1
BRMS1
CASP8
CBFB
CCND1
CDH1
CDKN1B
CDKN2A
CHEK2
CRIP1
CTCF
CTGF
CTNNB1
CXCL1
CXCR4
DICER1
DSC2
EGFR
ERBB2
ESR1
FANCM
FERMT1
FGFR1
FOXA1
FOXO3
GATA3
HORMAD1
IL11
ITGB8
KDM6A
KEAP1
KISS1
KRAS
MAF
MAP2K4
MAP3K1
MAP3K13
MAPK1
MCPH1
MDM2
MLH1
MLL2 (KMT2D)
MLL3
MLTT4 (AFDN)
MMP1
MRE11A
MSH2
MSH6
MYC
NAT1
NBN
NCOR1
NF1
NFE2L2
NOTCH1
NRAS
PALB2
PIK3CA
PIK3R1
PIK3R1
PMS2
PPM1D
PTEN
PTGS2
RAD50
RAD51
RAD51B
RAD51C
RAD51D
RB1
RECQL
RUNX1
SETD2
SF3B1
SMAD4
SMARCD1
SPEN
STK11
TBX3
TFCP2L1
TFF1
TFF3
TGFB1
TP53
UGT8
XRCC2
ZNF217
