# Supplementary material for: Circulating Cell-Free DNA Reflects the Clonal Evolution of Breast Cancer Tumors
Source: Cancers (Basel). 2022 Mar 4;14(5):1332. doi: 10.3390/cancers14051332 (PMC8909912; doi:10.3390/cancers14051332)
Supplement: Supplementary file 1 [file cancers-14-01332-s001.zip › TableS2.csv]

AKT1
APC
ARID1A
ARID2
ATM
BRAF
BRCA1
BRCA2
CBFB
CCND1
CDH1
CDKN1B
CDKN2A
CTCF
EGFR
ERBB2
ESR1
FGFR1
FOXA1
GATA3
KEAP1
KRAS
MAP2K4
MAP3K1
MDM2
MYC
NCOR1
NF1
NFE2L2
NOTCH1
PALB2
PIK3CA
PTEN
RB1
RUNX1
SF3B1
TBX3
TP53
ZNF217
